# Supplementary material for: Fluorescent hybrid nanospheres induced by single-stranded DNA and magnetic carbon quantum dots
Source: Royal Society of Chemistry journal article supplement (doi:10.1039/c8nj06157b), 2019-01-01
Supplement: c8nj06157b1.pdf [file c8nj06157b1.pdf]

Electronic supplementary information (ESI)

## **Fluorescent Hybrid Nanospheres Induced by Single-Stranded**

### **DNA and Magnetic Carbon Quantum Dots**

Ling Wang, Guangzhen Wang, Yitong Wang, Huizhong Liu, Shuli Dong, and  
Jingcheng Hao\*

Key Laboratory of Colloid and Interface Chemistry & Key Laboratory of Special  
Aggregated Materials, Shandong University, Ministry of Education, Jinan 250100, P.  
R. China

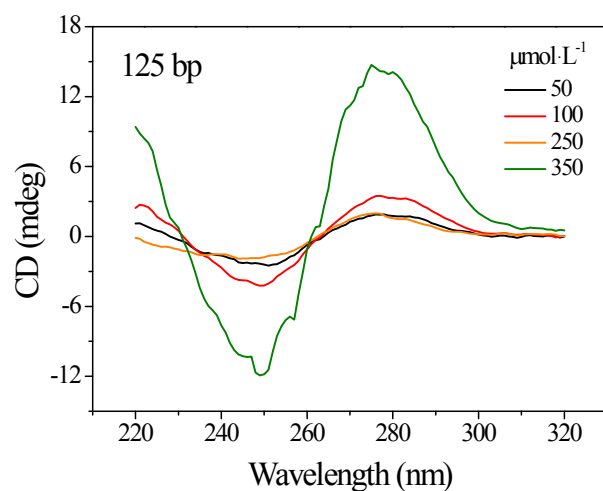

**Figure S1.** The CD spectra of CQDGd/ss-DNA complexes containing 125 bp ssDNA.

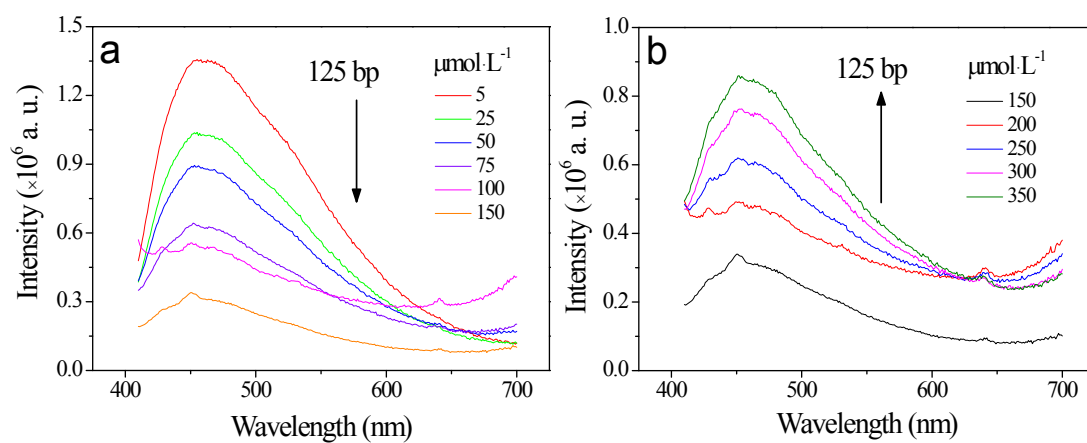

**Figure S2.** The fluorescence spectra (a, b) of CQDGd ( $33.33 \mu\text{g}\cdot\text{mL}^{-1}$ ) solution upon addition of ssDNA with 125 bp.

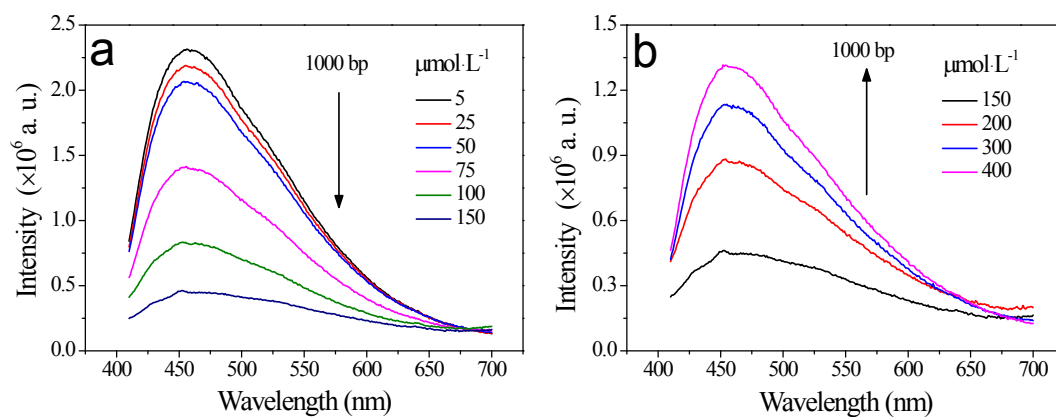

**Figure S3.** The fluorescence spectra (a, b) of CQDs-Br ( $33.33 \mu\text{g}\cdot\text{mL}^{-1}$ ) solution upon addition of ssDNA with 1000 bp.

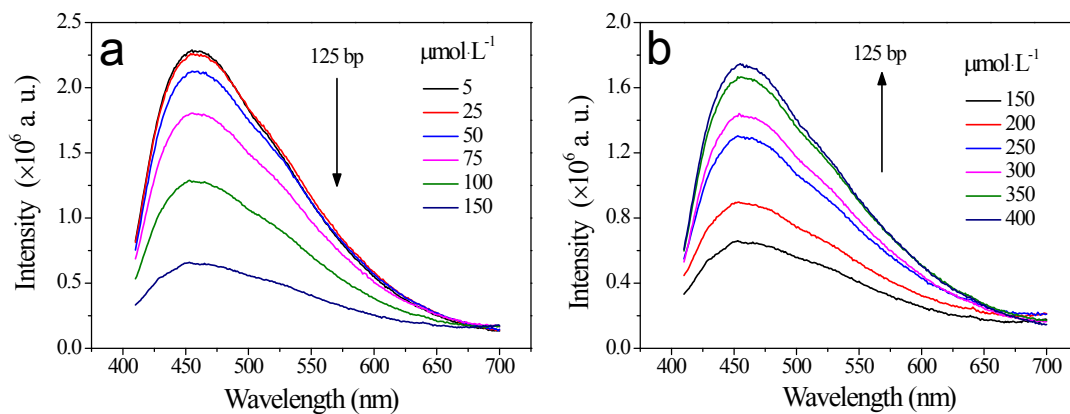

**Figure S4.** The fluorescence spectra (a, b) of CQDs-Br ( $33.33 \mu\text{mol}\cdot\text{L}^{-1}$ ) solution upon addition of ssDNA with 125 bp.

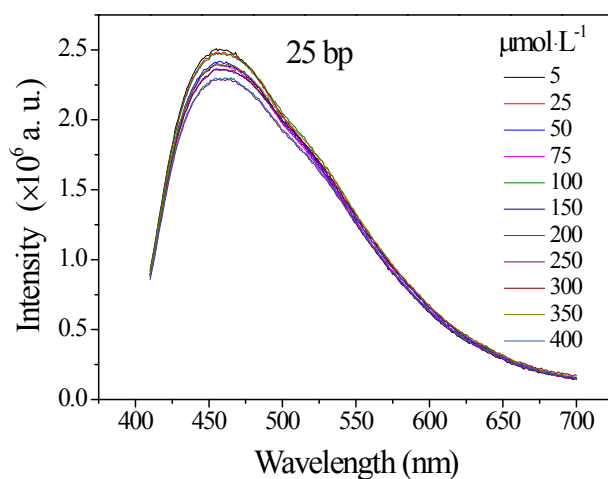

**Figure S5.** The fluorescence spectra of CQDs-Br ( $33.33 \mu\text{mol}\cdot\text{L}^{-1}$ ) solution upon addition of ssDNA with 25 bp.

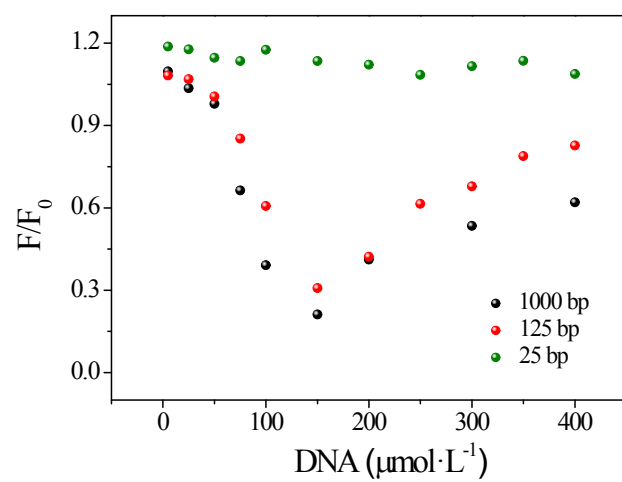

**Figure S6.** Effects of ssDNA containing various bp number on the intensity of CQDs-Br fluorescence.
